# Supplementary material
Source: PubMed Central journal article supplement (PMC3539741)
Supplement: NIHMS391890-supplement-01.pdf [file NIHMS391890-supplement-01.pdf]

**Table e1:** Parameter values for ordinal logistic model fits for the dose-response relationship for rectal cancer. Values in brackets indicate 95% confidence intervals. p-values are from likelihood ratio comparison with basic model.

| Model                                              | $b_{0,TRG1}$           | $b_{0,TRG2}$           | $b_{0,TRG3}$         | $b_1$                      | $b_{\text{clinical variable}}$            |
|----------------------------------------------------|------------------------|------------------------|----------------------|----------------------------|-------------------------------------------|
| Basic model, 3 response levels                     | -3.93<br>(-5.79;-2.18) | -3.08<br>(-4.87;-1.39) | 0.09<br>(-1.59;1.70) | 0.0427<br>(0.0153;0.0712)  | -                                         |
| 3 response levels + age [years]                    | -3.97<br>(-6.63;-1.40) | -3.12<br>(-5.72;-0.62) | 0.05<br>(-2.48;2.42) | 0.0426<br>(0.0148;0.0701)  | -0.0007<br>(-0.0283;0.0303)<br>p=0.9643   |
| 3 response levels + gender [male/female]*          | -3.94<br>(-5.75;-2.20) | -3.09<br>(-4.82;-1.39) | 0.08<br>(-1.59;1.67) | 0.0422<br>(-0.0708;0.0130) | 0.061<br>(-0.457;0.585)<br>p=0.8231       |
| 3 response levels + tumour stage [T3/T4]†          | -3.66<br>(-5.54;-1.68) | -2.80<br>(-4.64;-0.88) | 0.38<br>(-1.43;2.19) | 0.0394<br>(0.0091;0.0683)  | -0.518<br>(-1.201;0.193)<br>p=0.1613      |
| 3 response levels + nodal stage [N0/N1-2]††        | -2.97<br>(-5.14;-0.89) | -2.10<br>(-4.22;-0.06) | 1.09<br>(-0.98;3.05) | 0.0365<br>(0.0072;0.0659)  | -0.724<br>(-1.455; 0.018)<br>p=0.0391     |
| 3 response levels + tumour size [cm <sup>3</sup> ] | -3.38<br>(-5.34;-1.50) | -2.52<br>(-4.38;-0.68) | 0.69<br>(-1.19;2.42) | 0.0397<br>(0.0109;0.0683)  | -0.0068<br>(-0.0139; -0.0002)<br>p=0.0399 |

\* Gender included as a binary variable, with male=0 and female=1. † Tumour stage included as a binary variable, with T3=0 and T4=1. †† Nodal stage included as a binary variable, with N0=0 and N1/N2=1.
